1 **Main Manuscript for**

2 Low effective mechanical advantage of giraffes' limbs during walking  
3 reveals trade-off between limb length and locomotor performance

4 Christopher Basu<sup>1</sup> and John R. Hutchinson<sup>2</sup>

5 <sup>1</sup>School of Veterinary Medicine, University of Surrey, Guilford GU2 7XH, UK

6 <sup>2</sup>Structure & Motion Laboratory, Royal Veterinary College, Hawkshead Lane, North Mymms,  
7 Hatfield, Hertfordshire AL9 7TA, UK

8 Corresponding author Christopher Basu

9 **Email:** [christopherbasu@gmail.com](mailto:christopherbasu@gmail.com)

10 ORCID: Christopher Basu 0000-0002-2357-9516

11 ORCID: John R. Hutchinson 0000-0002-6767-7038

12 **Classification**

13 Biological Sciences, Biophysics and Computational Biology

14 **Keywords**

15 Biomechanics; Giraffids; giraffe; locomotion; scaling

16 **Author Contributions**

17 CB performed all analyses and wrote the manuscript

18 JRH guided the data analysis and co-drafted the manuscript.

19

20 **This PDF file includes:**

21 Main Text

22 Figures 1 to 5

23

24 **Abstract**

25

26 Giraffes (*Giraffa camelopardalis*) possess specialised locomotor morphology, namely elongate  
27 and gracile distal limbs. Whilst this contributes to their overall height (and enhanced feeding  
28 behaviour), we propose that the combination of long limb segments and modest muscle lever  
29 arms results in low effective mechanical advantage (EMA, the ratio of in-lever to out-lever  
30 moment arms), when compared with other cursorial mammals. To test this, we used a  
31 combination of experimentally measured kinematics and ground reaction forces (GRFs),  
32 musculoskeletal modelling, and inverse dynamics to calculate giraffe forelimb EMA during  
33 walking. Giraffes walk with an EMA of 0.34 ( $\pm 0.05$  S.D.), with no evident association with speed  
34 within their walking gait. Giraffe EMA was markedly below the expectations extrapolated from  
35 other mammals ranging from 0.03 – 297 kg, and provides further evidence that EMA plateaus or  
36 even diminishes in mammals exceeding horse size. We further tested the idea that limb  
37 segment length is a factor which determines EMA, by modelling the GRF and muscle moment  
38 arms in the extinct giraffid *Sivatherium giganteum* and the other extant giraffid *Okapia*  
39 *johnstoni*. *Giraffa* and *Okapia* shared similar EMA, despite a 4-6 fold difference in body mass  
40 (*Okapia* EMA = 0.38). In contrast *Sivatherium*, sharing a similar body mass to *Giraffa*, had greater  
41 EMA (0.59), which we propose reflects behavioural differences, such as athletic performance. Our  
42 modelling approach suggests that limb length is a determinant of GRF moment arm magnitude,  
43 and that unless muscle moment arms scale isometrically with limb length, tall mammals are  
44 prone to low EMA.

45 **Significance Statement**

46

47 Giraffes are the tallest living animals - using their height to access food unavailable to their  
48 competitors. It is not clear how their specialized anatomy impacts their athletic ability. We made  
49 musculoskeletal models of the forelimbs from a giraffe and two close relatives, and used  
50 motion-capture and forceplate data to measure how efficient they are when walking in a  
51 straight line. A horse for example, uses just 1 unit of muscle force to oppose 1 unit of force on  
52 the ground. Giraffe limbs however are comparatively disadvantaged – their muscles must

53 develop 3 units of force to oppose 1 unit of force at the ground. This explains why giraffes walk  
54 and run at relatively slow speeds.

55

56

57 **Main Text**

58

59 **Introduction**

60

61 Giraffes (*Giraffa camelopardalis*, Linnaeus 1758) are feeding specialists, but does the possession  
62 of a disproportionately long neck and long limbs facilitate or constrain other behaviors? Whilst  
63 their anatomy confers a recognized feeding advantage (Cameron and Toit, 2007), the effect on  
64 locomotor performance remains unclear. Giraffes embody the essence of cursorial morphology.  
65 Cursoriality refers to a number of anatomical traits which lend themselves to enhanced  
66 locomotor performance, including elongate distal limbs, digit loss or reduction, and restriction  
67 of joint rotation to the parasagittal plane (Gregory, 1912, Coombs, 1978). One method of  
68 measuring the degree of cursoriality is the ratio of metatarsal to femur length (MT:F). By this  
69 measure, giraffes display extreme cursoriality, with MT:F 1.4 (Garland and Janis 1993).  
70 Considering that horses (*Equus ferus caballus*), fast-running and quintessential cursorial  
71 mammals, have a MT:F of 0.8, giraffe morphology is extreme.

72 Mitchell suggested that giraffes' elongated appendicular skeleton delivers a 'mechanical  
73 advantage' during locomotion (1), and Pincher speculated that long limbs facilitate fast running  
74 speed (2). Yet despite their extreme cursorial morphology, giraffes are athletically challenged.  
75 For example adults giraffes run and walk at modest speeds, and lack an aerial phase in their  
76 galloping gait (3, 4), conforming to the observation that the largest terrestrial animals are not  
77 the fastest (5-7).

78 We propose that maximal locomotor performance in giraffes is constrained by their elongate  
79 limb segments (and consequently high shoulder height), rather than enhanced by it. At  
80 increasing distances from the ground, ground reaction force (GRF) vectors are more horizontally  
81 distant from the foot's center of pressure (COP); or point of GRF application. As a result, limb  
82 joints in taller animals may be subject to larger GRF moment arms than the homologous joints in  
83 shorter animals. Large GRF moment arms may reduce the effective mechanical advantage of the  
84 limb, or put more simply, limit the ability to resist gravitational forces (Biewener, 1989,1990).

85 Giraffids (Figure 1A and 1B) are an ideal group in which to explore this idea, as a diverse range of  
86 phenotypes (with respect to height) have existed in the lineage.

87 Effective mechanical advantage (EMA) is a measure of a given joint's (or limb's) leverage against  
88 the GRF; or in a simpler sense, the relative suitability of the joint (or overall limb) to resist  
89 gravity (Figure 2A). EMA is a useful variable to consider in the context of locomotion, as it is  
90 inversely proportional to the muscle force required to balance GRFs during locomotion, and is  
91 also associated with mechanical stress (8) and activated muscle volumes (9-11). EMA can be  
92 expressed as the ratio of the "antigravity" (typically extensor, or joint-straightening) in-lever  
93 muscle moment arm ( $r$ ), to the out-lever moment arm of the GRF vector ( $R$ ) during the stance  
94 phase of locomotion:

$$95 \quad \text{EMA} = r / R \quad \text{Eqn 1}$$

96 EMA scales allometrically with body mass in mammals ranging from mice (0.03 kg) to horses  
97 (275 kg), with a scaling exponent of 0.26 (12). This indicates that larger animals exert relatively  
98 smaller muscle forces in order to resist gravitational collapse of their limbs during the stance  
99 phase (here, with EMA measured at the trot-gallop transition). Horses have an EMA of  
100 approximately 1, indicating that their extensor muscle moment arms are equal to their GRF  
101 moment arms, on average. Hence for every 1 N of GRF, horses typically must develop 1 N of  
102 muscle force to maintain their posture. Their large EMA can be explained by their relatively  
103 upright posture, where their joints are closely aligned with the GRF vector.

104 A plateau might exist in the relationship of EMA with body mass, in animals exceeding horse  
105 size. Asian elephants (*Elephas maximus*) have an EMA of approximately 0.68 during slow walking  
106 (11), and a musculoskeletal model of the extinct *Tyrannosaurus rex* estimated that this animal  
107 moved with similar EMA (13). Similarly, relatively straight-limbed humans walk with an EMA  
108  $\sim 0.7$  (Biewener et al., 2004); and both humans and elephants shift to EMA  $\sim 0.5$  or less during  
109 more crouched running gaits (Ren, Miller et al. 2010). Hence horses have the highest EMA yet  
110 recorded, partly explaining their high athletic capacity despite their large size (e.g., Garland,  
111 1983).

112 The evolution of the giraffid appendicular skeleton has functional implications involving EMA.  
113 Giraffids with more ancestral morphology (Figure 1A) possessed relatively shorter limb

114 segments, and smaller body mass than *Giraffa* (14, 15). Okapis (*Okapia johnstoni*), the only  
115 other living giraffids, have body proportions considered to be more ancestral; with a modest  
116 body mass of 250 kg (16), and moderate limb and neck elongation (14, 17, 18).

117 *Sivatherium giganteum* (Falconer and Cautley 1836), from an extinct giraffid lineage (Figure 1A),  
118 displayed a different morphological phenotype, featuring extreme body mass in the presence of  
119 a robust appendicular skeleton and short neck (19). Comparing the EMA of giraffes, okapis and  
120 *Sivatherium*, in the context of their anatomical traits, would help reveal how limb proportions  
121 and locomotor constraints may have evolved in the giraffid clade, and how similar constraints  
122 may have evolved in other tall animals, such as sauropod dinosaurs.

123 Here we question whether elongate, cursorial limbs constrain locomotion, rather than facilitate  
124 it. Our first prediction is that giraffes' EMA is lower than expected for an animal of large body  
125 mass. To address this prediction, we used a synthesis of experimental data and musculoskeletal  
126 modelling to compare EMA of the giraffe forelimb (taken as the mean of EMA values at each  
127 joint) during walking to EMA values for animals ranging from mice to horses. Previous  
128 experimental work has demonstrated that forelimb and hindlimb EMAs in quadrupedal  
129 mammals are comparable (8, 11). We also use these data to test if low EMA may result in  
130 greater locomotor cost in giraffes by estimating active muscle volumes required during stance  
131 phase (9-11). Our second prediction is that EMA in the giraffid clade is associated with the  
132 lengths and proportions of the limb, i.e. taxa with longer limbs have poorer leverage against  
133 GRFs. EMA throughout the stance phase was estimated using skeletal models of *Giraffa*, *Okapia*  
134 and *Sivatherium* forelimbs, with modelled kinematics and GRFs. *Okapia* was assumed to be  
135 representative of giraffids' ancestral condition.

136

137

## 138 **Results**

139

### 140 **Giraffe EMA**

141 EMA values for each forelimb joint in the giraffe are displayed in Figure 3A. Mean EMA<sub>imp</sub> and  
142 EMA<sub>40</sub> ( $\pm 1$  standard deviation) values were 0.34 ( $\pm 0.05$ ) and 0.29 ( $\pm 0.05$ ) respectively, with no  
143 apparent relationship with speed. Although these were statistically different measurements (t  
144 test,  $p < 0.001$ ), the difference in biological terms was negligible. EMA was typically low at the

145 start and end of stance (Figure S1), although forces are also low during this time (3). EMA  
146 tended to abruptly rise to (and fall from) infinity during the stance phase, due to the GRF vector  
147 passing through some joints' centers of rotation.  
148  
149 EMA<sub>40</sub> was compared with data from other mammalian quadrupeds. Using the comparative  
150 dataset of animals ranging from 0.024 to 297 kg (20), an animal with body mass 780 kg was  
151 predicted to have an EMA of 1.3 (with 95% prediction interval 0.88 – 1.93). Giraffe forelimb EMA  
152 falls well below the 95% prediction interval (Figure 3B); about 24% of predicted EMA.  
153  
154 EMA<sub>imp</sub> sensitivity varied with the magnitude of COP displacement in *Giraffa* (Figure S2).  
155 Displacement of the COP from its initial location at the distal third phalanx resulted in modest  
156 variation in EMA. Changes of this magnitude (or other plausible COP assumptions) did not alter  
157 the result that giraffes' EMA falls well below the scaling prediction for smaller mammals.  
158 Estimated active muscle volume for each trial ranged 40 – 89 cm<sup>3</sup> kg<sup>-1</sup> m<sup>-1</sup>, with mean 54 (±14),  
159 and showed no apparent relationship with speed or stance duration.

160

### 161 **Comparisons of EMA between giraffids**

162 We modelled the stance phase of *Giraffa*, *Sivatherium* and *Okapia* (Videos S1-3), using statically  
163 posed skeletal models, animated with experimental kinematics. We tested for any difference  
164 between this method (EMA<sub>stat</sub>) and the experimentally derived giraffe data (EMA<sub>imp</sub>). There was  
165 no statistical difference between the two methods (t test, p=0.26). We further checked for  
166 errors in modelled GRF moment arms and muscle moment arms, in case concurrent errors were  
167 effectively cancelling each other out, resulting in net agreement.

168 Mass and inertial properties were ignored in the static models, where EMA<sub>stat</sub> was purely a  
169 geometric calculation (Eqn 1). This was a potential source of discrepancy when comparing with  
170 experimentally derived EMA<sub>imp</sub>, which did take these parameters into account (Eqn 4). To ensure  
171 we made sufficiently valid comparisons, we repeated EMA<sub>imp</sub> measurements using a giraffe  
172 musculoskeletal model with all mass properties set to zero, which in effect was equivalent to  
173 the simple measurement of r/R. We found that EMA<sub>imp</sub> for each trial was similar whether the  
174 limb's mass properties were enabled or ignored (t test p = 0.065; Figure S3).

175 Other potential sources of error from the EMA<sub>stat</sub> models for *Giraffa* included inaccurate muscle  
176 moment arm and/or GRF moment arm estimates. To test this, GRF moment arms were  
177 compared from the static models with moment arms from the inverse dynamics method (Figure  
178 S4). The GRF moment arms from the two methods, summarized as the mean moment arm, had  
179 a root mean square error (RMSE) of 6%. Therefore, we consider variable muscle moment arms  
180 to be the source of disparity between experimentally derived and modelled EMA.

181 The muscle moment arms measured from the static giraffe model were compared with the  
182 weighted mean moment arms (derived from the musculoskeletal model) used to calculate  
183 EMA<sub>imp</sub> (Figure S5). The largest disparities were observed at the shoulder joint, where the  
184 extensor moment arm was over-estimated by 0.04 m (~67%); a result which led to a greater  
185 EMA value and a non-significant bias against our assumption that static and dynamically  
186 modelled moment arms were similar. We assumed that similar disparities in all three taxa  
187 likewise were non-significant, but not problematic for addressing our study's key questions.

188 *Giraffa* incurred the greatest absolute GRF moment arms, followed by *Sivatherium* and *Okapia*,  
189 respectively (Figure 4A, S6). The muscle moment arms, modelled as the parasagittal distance  
190 from the estimated joint center of rotation to the bone surface, and normalized by shoulder  
191 height, were also compared. In most cases, *Sivatherium* had the largest muscle moment arms,  
192 with the exception of the MCP flexor moment arm (Figure 4B). There was imprecision associated  
193 with the measurement of the MCP moment arm in *Sivatherium*, as the proximal sesamoid bones  
194 were modelled and scaled from *Giraffa* (19). In most cases *Giraffa* possessed the smallest  
195 muscle moment arms. The greatest difference in muscle moment arms was between the *Giraffa*  
196 and *Sivatherium* olecranon process at the elbow joint.

197 The GRF and muscle moment arms above were used to estimate EMA<sub>stat</sub> over the course of a  
198 modelled stance phase for the three giraffid models. *Sivatherium* was estimated to have the  
199 greatest EMA<sub>stat</sub>, followed by *Okapia* and *Giraffa* (Figure 4C).

200

201 **Discussion**

202

203 **EMA in giraffes**

204 Giraffes have a smaller than expected EMA for an animal of such large body mass (Figure 3B).  
205 We found that a giraffe using a typical lateral sequence walking gait had a forelimb EMA<sub>40</sub> of  
206 0.29 rather than the value of 1.3 predicted from scaling of forelimb EMA in smaller taxa (8, 12,  
207 20). We predict that the same conclusions can be applied to the hindlimb, which (as in other  
208 cursorial mammals) display similar patterns of EMA (8). This value is also less than half that for  
209 walking Asian elephants (*Elephas maximus*) (11), and unlike Asian elephants, the giraffe's EMA  
210 did not change within the (narrow) range of observed speed.

211 We found that two common methods for calculating EMA (EMA<sub>imp</sub> and EMA<sub>40</sub>) yielded similar  
212 results (t-test, p=0.26) and led to comparable conclusions. EMA<sub>40</sub> in giraffes was outside of the  
213 95% prediction interval of the log-transformed linear model from Biewener (2005) (Figure 3B),  
214 and was consistent with the concept that an EMA plateau exists in animals with body mass in  
215 excess of 300 kg (11, 13, 20). Reasons for low EMA values in *Giraffa* can be ascribed to the  
216 magnitudes of the GRF and/or muscle moment arms. With regard to GRF moment arms, animals  
217 larger than horses probably are unable to align their GRF vector even closer to their joint centers  
218 to minimize R and maximize EMA (21), via increased straightening of the limb. In the case of the  
219 giraffe, our comparisons between closely related giraffid species suggest that their long segment  
220 lengths and shoulder height (and thus "cursorial" limb morphology) predispose them to  
221 exaggerated GRF moment arms (Figure 4A).

222 Alternatively, animals may be able to counter large GRF moment arms with similarly large  
223 muscle moment arms. This does not appear to be the case for giraffes. For example, the  
224 shoulder extensor moment arm of the long head of the triceps brachii muscle was 0.10 m  
225 throughout stance, similar to the 0.13 m predicted for a 780 kg animal (22). The moment arms  
226 of giraffes' major muscle groups are summarized in Table S1. We surmise that giraffes are ill-  
227 equipped to effectively offset such large GRF moment arms, resulting in low EMA.

228 Since the calculation of EMA dictates that it is inversely proportional to the active muscle  
229 volume (11), giraffes' relatively small EMA during walking suggests that a large volume of muscle  
230 is recruited to oppose the GRFs that act on a limb. Surprisingly though, giraffes' mass-specific



231 muscle volume recruitment ( $V_{\text{muscle}}$ ;  $40 - 89 \text{ cm}^3 \text{ kg}^{-1} \text{ m}^{-1}$ ) during walking is 4 – 8 times larger than  
232 in walking humans, but broadly in line with other quadrupeds, including dogs, quadrupedal  
233 chimpanzees and elephants (11, 23). Low EMA is instead compensated for by long step lengths  
234 and relatively short muscle fascicles; shorter than the predictions for other non-hopping  
235 mammals (22).

236 We were unable to correlate active muscle volume with metabolic cost of transport in walking  
237 giraffes, as such data are unavailable. But since active muscle volume is correlated with  
238 metabolic costs in birds and mammalian quadrupeds and bipeds (11), we similarly expect that  
239 giraffes incur modest cost of transport at the slow walking speeds observed, and speculate that  
240 locomotor economy is an important factor in determining preferred speed. We previously  
241 suggested that giraffes avoid speeds outside of this optimum, due to sharp increases in  
242 metabolic cost (3). We predict that faster speeds during walking or their galloping gait (4) are  
243 met with increased step lengths and (potentially) changes in limb EMA, leading to higher  
244 metabolic costs, and that this places a constraint on giraffes' athletic performance.

245 EMA also relates to mechanical stress of supportive tissues. The scaling of  $\text{EMA} \propto \text{BM}^{0.26}$  in  
246 mammals from 0.03 – 300 kg BM, combined with  $\text{PCSA} \propto \text{BM}^{0.80}$ , suggests that supportive tissue  
247 stresses are nearly independent of body mass (20, 22). As a consequence, animals with below-  
248 expected EMA may risk higher skeletal and muscle stress, and catastrophic failure if no other  
249 changes are made to their locomotor dynamics. In order to reduce the risk of tissue failure,  
250 giraffes should be forced to reduce their athletic ability (7). Low EMA may explain giraffes'  
251 limited capacity for speed (4, 24, 25), and may be a contributing factor as to why giraffes do not  
252 gallop in a dynamically similar manner to other mammalian quadrupeds (4).

253 We reject the notion that giraffes' extreme height disposes them to a 'mechanical advantage' in  
254 locomotion (1), or that their long limbs facilitate fast speed locomotion (2). Instead, we find  
255 support for our prediction that extreme height and limb length in animals such as giraffids  
256 exceeding 300 kg results in increased GRF moment arms, and logically, reduced EMA.

257 **EMA of giraffid species**

258  $EMA_{stat}$  from *Giraffa*, *Sivatherium* and *Okapia* - three phenotypically distinct giraffids - were  
259 estimated, using statically posed skeletal models. We used this modelling method to predict  
260 how changes in limb segment lengths can alter  $EMA_{stat}$  of a limb, and as a consequence, drive  
261 changes in locomotor behaviour. At each joint, *Giraffa* consistently had the greatest absolute  
262 GRF moment arms (and lowest  $EMA_{stat}$ ), contrasting with *Okapia* which had the smallest (Figure  
263 4A, S8). When these moment arms were normalized to shoulder height, these differences  
264 disappeared. This is consistent with the assumption of geometrically similar GRF orientation  
265 between the three studied taxa, and implies that GRF moment arms should scale isometrically  
266 with shoulder height. If this assumption is experimentally confirmed for a phylogenetically  
267 diverse sample of cursorial mammals, tall animals will be subject to large GRF moment arms  
268 (Figure 5); this offers an explanation as to why EMA diminishes in mammals exceeding horse  
269 size.

270 EMA is also dependent on muscle moment arm length. To test whether or not large (>300 kg)  
271 body mass is strictly associated with low  $EMA_{stat}$ , we modelled the muscle moment arms and  
272 GRF moment arms of *Sivatherium giganteum*. Despite sharing a similar body mass, and probably  
273 a similarly upright limb posture (Figure 1B), mean  $EMA_{stat}$  was predicted to be 2 times greater in  
274 *Sivatherium*, compared with *Giraffa*. The source of this apparent difference lay both in the  
275 differences in GRF moment arm (Figures 4A, 5) and *Sivatherium*'s relatively large 'antigravity'  
276 muscle moment arms (Figure 4B).

277 The robustness of the *Sivatherium* skeleton is exemplified by the olecranon process of the fused  
278 radioulna bone, which is a useful proxy for the magnitude of the elbow extensor muscles'  
279 moment arm. The 'considerable' projection of the olecranon was noted in an early fossil  
280 description (26). The olecranon process of *Sivatherium* was indeed considerably longer than in  
281 *Giraffa* (Table S1), by 0.07 m (an 80% difference in parasagittal length, despite similar body  
282 mass). Hence we speculate that *Sivatherium* was better equipped to offset the GRF moment  
283 arms encountered during the stance phase, than the more gracile *Giraffa*.

284 We surmise that giraffes' extreme height has incurred a locomotor performance penalty, which  
285 may reflect their relatively modest athleticism (25). This complements the specializations in  
286 behavior and ecology seen in megaherbivores (27). For example, reduced predation in adult

287 giraffes (28, 29) may relax the selection pressures for high performance traits, such as speed and  
288 endurance. Such relaxation of selection pressures may subsequently facilitate the expression of  
289 novel or extreme morphology.

## 290 **Conclusions**

291 We have highlighted that giraffes use lower than expected effective mechanical advantage, as  
292 their musculoskeletal morphology (such as the ulna's olecranon process) is insufficient to  
293 maintain the observed trend in EMA in animals up to 300 kg. Our results from an analysis of  
294 modelled GRF moment arms and muscle moment arms suggested that giraffes' EMA is similar to  
295 okapis, a giraffid with lower body mass and more plesiomorphic locomotor traits. Low EMA was  
296 not ubiquitous among the giraffids, as *Sivatherium giganteum* was predicted to have greater  
297 EMA; but still low compared to smaller mammals, even horses. The differential EMA between  
298 *Sivatherium* and *Giraffa* may reflect behavioural or athletic differences between these two  
299 similarly sized giraffids. Whilst giraffes' feeding ability is driven by extreme height, it appears  
300 that this specialization has come with a functional trade-off with locomotor performance.

301

302

303

## 304 **Materials and Methods**

305

### 306 **Dynamic musculoskeletal modelling**

307 A rigid-body giraffe musculoskeletal model was developed using the software package Software  
308 for Interactive Musculoskeletal Modeling (SIMM v6.0; MusculoGraphics Inc, California, USA), as  
309 follows. The skeleton of a cadaveric forelimb from a captive bred 7 year old male giraffe  
310 donated postmortem by a local zoo, with body mass 880 kg, was segmented from CT images  
311 (2.5 mm slice thickness, 100 kV, 200 Ma, Lightspeed Pro 16 slice CT, GE Medical,  
312 Buckinghamshire, UK), and the resulting meshes exported as .stl files using the software package  
313 Mimics (v19.0 Materialise, Leuven, Belgium). The digitized bones of the forelimb were then used  
314 to construct a model (Figure 2B) consisting of five body segments (scapula, humerus, radioulna,  
315 metacarpus and phalanges). Joint axes were assigned, and the limb segments were aligned into  
316 a neutral reference pose (all joints at 0° = vertically aligned) using the software Maya (2016,  
317 Autodesk, California, USA). Joint axes were restricted to flexion and extension (i.e. hinge joints).

318 Muscle paths were added in SIMM, following established methods (30-32), guided using muscle  
319 geometry derived from CT data and gross dissection of the cadaver. The origins of forelimb  
320 extrinsic muscles were estimated in the model, as cadaveric geometry for the neck and skull  
321 were unavailable. Thirty-one musculotendon actuators were included (Supplementary  
322 Information). The mass and centre of mass (COM) of each segment (including soft tissues) were  
323 estimated with the methodology of (33) and (34), where the convex hull and subsequent mass  
324 parameters for each segment were calculated using the convex hull function of Meshlab version  
325 2016.12 (35) and custom code written in Matlab (Mathworks, Massachusetts, USA). The  
326 geometry of the 880 kg giraffe model was isometrically scaled to the size of a 780 kg giraffe  
327 using OpenSim 3.3 (36), to match data from an experimental subject.

328

329 The calculation of EMA in Eqn. 1 is derived from the notion that joint moments induced by a GRF  
330 must be balanced by an opposing and equal muscle moment, i.e.:

$$331 \quad GRF \times R = Force_{muscle} \times r \quad \text{Eqn 2}$$

332 Rearranged, EMA can be expressed both in terms of moment arms and in terms of forces:

$$333 \quad \frac{r}{R} = \frac{GRF}{Force_{muscle}} \quad \text{Eqn 3}$$

334 Forces can be considered over the duration of the stance phase by calculating impulses (force-  
335 time integrals). In this way, EMA can be expressed as:

$$336 \quad EMA_{imp} = \frac{\int GRF dt}{\int Force_{muscle} dt} \quad \text{Eqn 4}$$

337 Using the impulses (9, 11, 37) has the advantage that the entire stance duration can be  
338 considered, not just a single instant or the mean across a step. Overall limb  $EMA_{imp}$  was  
339 calculated as the mean of  $EMA_{imp}$  at each joint (12).

340 Experimentally derived GRF and kinematic data (3) were used to calculate EMA at each joint,  
341 throughout the stance phase. Briefly, three adult reticulated giraffes walked over a three-axis  
342 force platform, in front of a video camera (Video S1). Joint centers were visually estimated and  
343 digitized using DLTV6 (38). 14 walking steps from one individual were selected from the larger  
344 dataset, with speed ranging from 0.8 to 1.2  $ms^{-1}$  (0.04 to 0.08 Froude number). These were

345 selected on the basis that the giraffe was not obscured by any foreground objects. This work  
346 was conducted with ethical approval (number URN 2016 1538) from the Clinical Research Ethical  
347 Review Board of the Royal Veterinary College, University of London.

348 Forces (e.g. of muscles acting around a joint) can be estimated from moment and muscle  
349 moment arm (Eqn. 3), assuming static equilibrium:

$$350 \quad Force_{muscle} = \frac{\text{moment}}{r} \quad \text{Eqn 5}$$

351 Total net moments acting at each joint were calculated using the inverse dynamics function in  
352 OpenSim 3.3 (36), where inertial ( $M_{inert}$ ) and gravitational ( $M_{grav}$ ) moments at the shoulder,  
353 elbow, carpus and MCP were considered along with the moments required to generate ground  
354 reaction force ( $M_{GRF}$ )(9). The integral of total muscle force acting around each joint (i.e.,  
355  $Force_{muscle}$  in equation 4) was calculated by dividing joint moments by the weighted mean  
356 muscle moment arm for muscles crossing that joint (equation 5 and see below). When a joint  
357 had variable action during stance (e.g. flexion followed by extension), force integrals for flexion  
358 and extension were separately calculated using their respective moment arm, and then summed  
359 to give total force.

360 The agonist muscle moment arm ( $r$ , Figure 2A) for each joint was calculated as the mean  
361 moment arm of the muscles at the time of peak GRF, weighted by each muscle's contribution to  
362 total muscle physiological cross-sectional area (PCSA; see below), and with the numerical  
363 subscripts for  $r$  and PCSA below referring to each muscle's moment arm or PCSA. This assumed  
364 that all agonist muscles were similarly active (9, 12) (Eqn 6). We did not address the issue of co-  
365 contraction by antagonist muscle groups, as these forces were assumed to be non-significant  
366 with respect to total muscle force. This approach keeps our analysis maximally comparable to  
367 other studies of mammalian EMA, vs. a more comprehensive dynamic simulation analysis.

368

$$369 \quad r = r_1 * \frac{PCSA_1}{PCSA_{total}} + r_2 * \frac{PCSA_2}{PCSA_{total}} + r_3 * \frac{PCSA_3}{PCSA_{total}} \dots \quad \text{Eqn 6}$$

370

371 PCSAs of muscles from the same 880 kg individual were measured using muscle architecture  
372 methods from muscle mass, pennation, and mean fascicle length (37). The extrinsic muscles of

373 the adult forelimb were missing; the PCSAs of these muscles were estimated by isometrically  
374 scaling PCSA of the corresponding muscles from a sub-adult giraffe cadaver, with body mass 480  
375 kg. Isometry was chosen as an assumption in the absence of other data, as the bones of the  
376 forelimb scale with or close to isometry in the post-natal giraffe (39). Modest allometry of these  
377 missing muscles would not be expected to influence our results or conclusions in a pronounced  
378 way.

379

380 Whilst recent studies have used the above impulse method to calculate EMA (9, 11, 40), EMA  
381 from a varied range of mammalian species has been previously calculated as the mean ratio  $r/R$ ,  
382 during the middle third of stance and at the trot-gallop transition (12). To facilitate comparisons  
383 between giraffes and other terrestrial mammals, EMA was additionally calculated in a more  
384 comparable manner. For each joint, following Biewener (1989),  $r/R$  was calculated when  $M_{GRF} >$   
385 40% of maximum  $M_{GRF}$ , which approximately corresponds to the middle third of stance. A mean  
386 value of EMA at each joint was calculated from this sample, here referred to as  $EMA_{40}$ .

387

388 Giraffe forelimb  $EMA_{40}$  was compared with a compiled dataset of EMA from 12 other  
389 mammalian species (8). Data points from a logarithmic scatter plot from this publication were  
390 digitised and replotted. The data were log-transformed, and a least squares regression model  
391 was used to calculate the 95% prediction interval for the EMA versus body mass relationship.  
392 Following prior studies and considering the modest sample size, potential biases incurred by  
393 phylogeny were not addressed. All data were analysed using Matlab.

394

395 EMA calculations are sensitive to the location of the center of pressure (COP). COP data derived  
396 from raw force plate outputs in giraffes were excluded from this analysis due to excessive signal  
397 noise. In our model, the COP was fixed at the distal tip of the third phalanx. Placing the COP at  
398 this location facilitates repeatability of the method with different model taxa, but experimental  
399 data from a variety of animals show that COP is dynamic during the stance phase; tending to  
400 track cranially from an initial caudal position at the heel (41-44). A sensitivity analysis was  
401 performed to assess the effect of COP location on EMA for one trial, where the COP was  
402 randomly displaced (using Matlab) from the distal tip of the foot 100 times, to a maximum of 0.1  
403 m (i.e. the length of the distal phalanges). EMA was then calculated in each case.

404

405 We estimated the mass-specific volume muscle activated per distance travelled for each of the  
406 trials (11, 23, 37), calculated as:

$$407 \quad V_{musc} = \frac{1}{\sigma} \times \left( \frac{l_{fasc,shoulder}}{EMA_{shoulder}} + \frac{l_{fasc,elbow}}{EMA_{elbow}} + \frac{l_{fasc,carpus}}{EMA_{carpus}} + \frac{l_{fasc,MCP}}{EMA_{MCP}} \right) \times \frac{g}{L_{step}}, \quad \text{Eqn 7}$$

408

409 where  $V_{musc}$  is in units  $\text{cm}^{-3} \text{kg}^{-1} \text{m}^{-1}$ ,  $\sigma$  is assumed constant muscle stress ( $20 \text{ Ncm}^{-2}$ ),  $g$  is  
410 acceleration due to gravity ( $9.81 \text{ ms}^{-2}$ ),  $l_{fasc}$  values are the mean agonist muscle fascicle lengths  
411 (in cm) at each joint, weighted by each muscle's relative PCSA (similar to equation 6), EMA is  
412 derived from the ratio of GRF to muscle force (equation 4), and  $L_{step}$  is the horizontal distance  
413 travelled by the center of mass during the stance phase.

414

#### 415 **Static musculoskeletal modelling**

416 We generated biomechanical models of the forelimb stance phase for the extinct *Sivatherium*  
417 *giganteum* and the extant *Okapia johnstoni* to estimate EMA in these taxa. We chose the  
418 simplified approach of modelling the limbs as rigid multi-segmented structures. These models  
419 are termed 'static' because the internal joint angles were fixed; not driven by experimental  
420 kinematic data as for *Giraffa*; although all three taxa studied were analyzed using lever  
421 mechanics. The static models were used to estimate the GRF and muscle moment arms  
422 throughout stance (Figure 1B), during a modelled walking step. The model for *Okapia* was  
423 derived from photogrammetry of a complete mounted skeleton (specimen USNM 399337,  
424 Smithsonian Institution, Washington, DC, USA), mounted in a standing posture. A 3D mesh was  
425 generated from 300 digital photographs of the specimen using Photoscan v1.4 (Agisoft, St.  
426 Petersburg, Russia) and Meshlab v2016 (35). The forelimb skeleton of *Sivatherium giganteum*  
427 was reconstructed from ten fossil specimens from the Natural History Museum, UK (Table S2).  
428 3D surface meshes were derived from photogrammetry of these specimens, and articulated into  
429 a reconstruction. It is likely that these post-cranial specimens may be attributed to the same  
430 individual (45). The missing distal phalanx and proximal sesamoid bones were scaled from the  
431 same 880 kg giraffe (19).

432 Stance phase postures and all measurements were implemented in Maya. Mid-stance forelimb  
433 joint angles for the okapi (Table S3) were derived from walking in healthy okapis (personal

434 communication [46]). A reconstruction of the *Sivatherium* mid-stance posture required three  
435 joint angles to be assumed, for the elbow, carpus and metacarpophalangeal (MCP) joints. The  
436 elbow angle was estimated by positioning the olecranon process of the radioulna perpendicular  
437 to the long axis of the humerus (47). The carpal joint angle was assumed to be fixed in a neutral  
438 position (0°) during stance. There is no tested method to predict MCP joint angle in extinct  
439 species using surface bone geometry. Thus for the current purpose, we speculated that loading  
440 at the MCP joint, due to body weight, was similar in *Sivatherium* as it is in *Giraffa*, given their  
441 similar body masses (19). We therefore assigned the same internal MCP angle to *Sivatherium*, as  
442 for the mid-stance giraffe model.

443

444 To model limb joint kinematics during stance, each limb was modelled as a stiff inverted  
445 pendulum (48), whereby the rigid limb vaults over a pivot. The most distal extremity of the third  
446 phalanx was assumed to be the rotation point. The angular sweep of the forelimb about this  
447 point was modelled on the motion of the giraffe's shoulder through a walking stance phase. The  
448 unit vector of the shoulder position (from the toe) was measured at each timestep throughout  
449 stance, and imposed on the models of *Sivatherium* and *Okapi*. It was reasonable to extrapolate  
450 *Giraffa* kinematics to closely related species, considering that giraffes walk in a dynamically  
451 similar fashion to other mammalian quadrupeds (3), and more specifically similar to other  
452 cetartiodactyls ranging in size from domestic sheep (*Ovis aries*) to giraffes (49).

453 Model GRF vectors were required for the extinct giraffid *Sivatherium*, and for *Okapia*. *Giraffa*, as  
454 a closely related species, was used to model the GRFs of *Sivatherium* and *Okapia*. The validity of  
455 this approach was tested by comparing the GRF unit vectors of giraffes with other cetartiodactyl  
456 ungulates. During a steady state walking step, the unit GRF vector changes from positive  
457 (deceleration) to negative (acceleration). To assess whether the GRF vector is consistent  
458 amongst different mammalian cursorial taxa, the unit vectors of a giraffe were compared with  
459 two other ungulates whose phylogenetic relationships form a close bracket around the position  
460 of *Giraffa* (50). If a trait is conserved within this bracket (in this case a postural trait, supported  
461 by relatively conservative morphology), it can be assumed that all descendants of the root  
462 ancestor (including *Okapia* and *Sivatherium*) similarly share this character (51, 52). The unit  
463 vectors from the walking gait of red deer (*Cervus elephas*) and dromedary (*Camelus*  
464 *dromedarius*) were collected using the same force plate equipment (53), and compared with the



465 stance phase unit vectors from the giraffe. Their GRF unit vectors showed a consistent pattern  
466 of change (Figure S7), and fall within the giraffe inter-trial variation.

467

468 GRF moment arms (R) with respect to the shoulder, elbow, carpus and MCP joint were  
469 calculated from the toe – joint vector (a) and GRF vector (b):

470

$$471 \quad R = \sqrt{(|\mathbf{a}|)^2 - (\mathbf{a} \cdot \hat{\mathbf{b}})^2} \quad \text{Eqn 8}$$

472

473 Muscle moment arms (r) were simplified to a single measurement of the flexor moment arm at  
474 the carpus and MCP joint, and extensor moment arms at the shoulder and elbow (Figure S8).

475  $EMA_{\text{stat}}$  was calculated as  $r/R$  (Equation 3) at each percentage time step during stance. Only  
476 flexor muscle moment arms at the carpus and MCP joints were included in the analysis, as these  
477 account for the anti-gravity function throughout the stance phase. In the case of the shoulder  
478 and elbow, the flexor muscle moment arms depend on prior interpretations of muscle origins  
479 and insertions (i.e. a musculoskeletal model), and were not included in this analysis (Figure S1).  
480 Adopting this approach permitted readily objective comparisons between specimens including  
481 the fossil giraffid. We then compared these simplified geometric measurements in the static  
482 *Giraffa* model with those derived from experimental inverse dynamics, to assess the validity of  
483 this approach.

484

485 This static modelling approach made the following assumptions that throughout the stance  
486 phase: (1) GRF unit vectors are the same in *Giraffa*, *Okapia* and *Sivatherium*; (2) the toe to  
487 shoulder unit vectors are the same in *Giraffa*, *Okapia* and *Sivatherium*; (3) joint angles are  
488 constant throughout stance. These assumptions are static simplifications of an otherwise  
489 dynamic behavior. In order to assess the validity of the subsequent EMA calculations, an  
490 additional *Giraffa* static model was created using the same methodology. The static model's  
491 moment arms and EMA were compared with those derived from the experimental data (Figure  
492 S1, S4-5).

493

494

495 **Acknowledgments**

496

497 We thank Pip Brewer from the Natural History Museum (UK) and Darrin Lunde from the  
498 Smithsonian National Museum of Natural History (USA) for access to giraffid specimens; Vivian  
499 Allen, Jeffery Rankin and Heinrich Mallison for helpful discussions and technical technical  
500 assistance; and Kristiaan D’Août for data on okapi kinematics. Ashleigh Wiseman and Peter  
501 Bishop provided helpful comments on the manuscript. Thank you also to Peter Aerts and Helen  
502 Birch for their feedback on CB’s PhD thesis chapter from which this publication is derived. We  
503 thank NERC for funding this work (PhD studentship for C.B.; grant no. NE/K004751/1 to J.R.H.).

504

505

## 506 References

507

508

- 509 1. G. Mitchell, J. Skinner, On the origin, evolution and phylogeny of giraffes *Giraffa*  
510 *camelopardalis*. *Transactions of the Royal Society of South Africa* **58**, 51-73 (2003).
- 511 2. C. Pincher, Evolution of the giraffe. *Nature* **164**, 29-29 (1949).
- 512 3. C. Basu, A. M. Wilson, J. R. Hutchinson, The locomotor kinematics and ground reaction  
513 forces of walking giraffes. *Journal of Experimental Biology* **222** (2019).
- 514 4. C. K. Basu, F. Deacon, J. R. Hutchinson, A. M. Wilson, The running kinematics of free-  
515 roaming giraffes, measured using a low cost unmanned aerial vehicle (UAV). *PeerJ* **7**,  
516 e6312 (2019).
- 517 5. T. Garland, Scaling the Ecological Cost of Transport to Body Mass in Terrestrial  
518 Mammals. *The American Naturalist* **121**, 571-587 (1983).
- 519 6. M. R. Hirt, W. Jetz, B. C. Rall, U. Brose, A general scaling law reveals why the largest  
520 animals are not the fastest. *Nature Ecology & Evolution* **1**, 1116 (2017).
- 521 7. T. J. M. Dick, C. J. Clemente, Where Have All the Giants Gone? How Animals Deal with  
522 the Problem of Size. *PLOS Biology* **15** (2017).
- 523 8. A. A. Biewener, Biomechanical consequences of scaling. *Journal of Experimental Biology*  
524 **208**, 1665-1676 (2005).
- 525 9. A. A. Biewener, C. T. Farley, T. J. Roberts, M. Temaner, Muscle mechanical advantage of  
526 human walking and running: implications for energy cost. *Journal of Applied Physiology*  
527 **97**, 2266-2274 (2004).
- 528 10. H. Pontzer, Effective limb length and the scaling of locomotor cost in terrestrial animals.  
529 *Journal of Experimental Biology* **210**, 1752-1761 (2007).
- 530 11. L. Ren, C. E. Miller, R. Lair, J. R. Hutchinson, Integration of biomechanical compliance,  
531 leverage, and power in elephant limbs. *Proceedings of the National Academy of Sciences*  
532 **107**, 7078-7082 (2010).
- 533 12. A. Biewener, Scaling body support in mammals: limb posture and muscle mechanics.  
534 *Science* **245**, 45-48 (1989).
- 535 13. J. R. Hutchinson, M. Garcia, Tyrannosaurus was not a fast runner. *Nature* **415**, 1018-  
536 1021 (2002).
- 537 14. N. Solounias, Family Giraffidae. *The evolution of artiodactyls*, 257 (2007).
- 538 15. W. R. Hamilton, Fossil giraffes from the Miocene of Africa and a revision of the  
539 phylogeny of the Giraffoidea. *Philosophical transactions of the Royal Society of London.*  
540 *Series B, Biological sciences*, 165-229 (1978).

- 541 16. J. E. Fa, A. Purvis, Body size, diet and population density in Afrotropical forest mammals:  
542 a comparison with neotropical species. *Journal of Animal Ecology*, 98-112 (1997).
- 543 17. M. Danowitz, N. Solounias, The Cervical Osteology of *Okapia johnstoni* and *Giraffa*  
544 *camelopardalis*. *PloS one* **10**, e0136552 (2015).
- 545 18. N. A. Badlangana, JW; Manger, P, The giraffe cervical vertebral column: a heuristic  
546 example in understanding evolutionary processes? *Zoological Journal of the Linnean*  
547 *Society* **155**, 736-757 (2009).
- 548 19. C. Basu, P. L. Falkingham, J. R. Hutchinson, The extinct, giant giraffid *Sivatherium*  
549 *giganteum*: skeletal reconstruction and body mass estimation. *Biology Letters* **12** (2016).
- 550 20. A. A. Biewener, Biomechanics of mammalian terrestrial locomotion. *Science* **250**, 1097-  
551 1103 (1990).
- 552 21. J. R. Hutchinson, Response: Of ideas, dichotomies, methods, and data – how much do  
553 elephant kinematics differ from those of other large animals? *Journal of Experimental*  
554 *Biology* **212**, 153-154 (2009).
- 555 22. R. Alexander, A. Jayes, G. Maloiy, E. Wathuta, Allometry of the leg muscles of mammals.  
556 *Journal of Zoology* **194**, 539-552 (1981).
- 557 23. H. Pontzer, D. A. Raichlen, M. D. Sockol, The metabolic cost of walking in humans,  
558 chimpanzees, and early hominins. *Journal of Human Evolution* **56**, 43-54 (2009).
- 559 24. T. Garland, C. M. Janis, Does metatarsal/femur ratio predict maximal running speed in  
560 cursorial mammals? *Journal of Zoology* **229**, 133-151 (1993).
- 561 25. T. Garland, The relation between maximal running speed and body mass in terrestrial  
562 mammals. *Journal of Zoology* **199**, 157-170 (1983).
- 563 26. H. Falconer, *Palaeontological Memoirs and Notes of the late Hugh Falconer: With a*  
564 *Biographical Sketch of the Author Compiled and edited by Charles Murchison* (Rob.  
565 Hardwicke, 1868).
- 566 27. J. E. Cohen, S. L. Pimm, P. Yodzis, J. Saldaña, Body sizes of animal predators and animal  
567 prey in food webs. *Journal of animal ecology*, 67-78 (1993).
- 568 28. R. Pellew, The giraffe and its food resource in the Serengeti. I. Composition, biomass and  
569 production of available browse. *African Journal of Ecology* **21**, 241-267 (1983).
- 570 29. N. Owen-Smith, M. G. L. Mills, Predator–prey size relationships in an African large-  
571 mammal food web. *Journal of Animal Ecology* **77**, 173-183 (2008).
- 572 30. J. R. Hutchinson, F. C. Anderson, S. S. Blemker, S. L. Delp, Analysis of hindlimb muscle  
573 moment arms in *Tyrannosaurus rex* using a three-dimensional musculoskeletal  
574 computer model: implications for stance, gait, and speed. *Paleobiology* **31**, 676-701  
575 (2005).
- 576 31. J. R. Hutchinson *et al.*, Musculoskeletal modelling of an ostrich (*Struthio camelus*) pelvic  
577 limb: influence of limb orientation on muscular capacity during locomotion. *PeerJ* **3**,  
578 e1001 (2015).
- 579 32. J. P. Charles, O. Cappellari, A. J. Spence, D. J. Wells, J. R. Hutchinson, Muscle moment  
580 arms and sensitivity analysis of a mouse hindlimb musculoskeletal model. *Journal of*  
581 *Anatomy* 10.1111/joa.12461 (2016).
- 582 33. W. Sellers *et al.*, Minimum convex hull mass estimations of complete mounted  
583 skeletons. *Biology Letters*, rsbl20120263 (2012).
- 584 34. V. Allen, H. Paxton, J. R. Hutchinson, Variation in center of mass estimates for extant  
585 sauropsids and its importance for reconstructing inertial properties of extinct  
586 archosaurs. *The Anatomical Record* **292**, 1442-1461 (2009).

- 587 35. P. Cignoni *et al.* (2008) Meshlab: an open-source mesh processing tool. in *Eurographics*  
588 *Italian Chapter Conference*, pp 129-136.
- 589 36. S. L. Delp *et al.*, OpenSim: open-source software to create and analyze dynamic  
590 simulations of movement. *Biomedical Engineering, IEEE Transactions on* **54**, 1940-1950  
591 (2007).
- 592 37. T. J. Roberts, M. S. Chen, C. R. Taylor, Energetics of bipedal running. II. Limb design and  
593 running mechanics. *Journal of Experimental Biology* **201**, 2753-2762 (1998).
- 594 38. T. L. Hedrick, Software techniques for two- and three-dimensional kinematic  
595 measurements of biological and biomimetic systems. *Bioinspiration & biomimetics* **3**,  
596 034001 (2008).
- 597 39. S. van Sittert, J. Skinner, G. Mitchell, Scaling of the appendicular skeleton of the giraffe  
598 (*Giraffa camelopardalis*). *Journal of morphology* 10.1002/jmor.20358 (2014).
- 599 40. A. D. Foster *et al.*, Ontogeny of effective mechanical advantage in eastern cottontail  
600 rabbits (*Sylvilagus floridanus*). *The Journal of experimental biology* **222**, jeb205237  
601 (2019).
- 602 41. P. Van der Tol *et al.*, The effect of preventive trimming on weight bearing and force  
603 balance on the claws of dairy cattle. *Journal of Dairy Science* **87**, 1732-1738 (2004).
- 604 42. M. Grundy, P. Tosh, R. McLeish, L. Smidt, An investigation of the centres of pressure  
605 under the foot while walking. *Bone & Joint Journal* **57**, 98-103 (1975).
- 606 43. O. Panagiotopoulou, T. C. Pataky, Z. Hill, J. R. Hutchinson, Statistical parametric mapping  
607 of the regional distribution and ontogenetic scaling of foot pressures during walking in  
608 Asian elephants (*Elephas maximus*). *The Journal of experimental biology* **215**, 1584-1593  
609 (2012).
- 610 44. D. R. Carrier, N. C. Heglund, K. D. Earls, Variable gearing during locomotion in the human  
611 musculoskeletal system. *Science* **265**, 651-653 (1994).
- 612 45. H. Falconer, *Palaeontological Memoirs and Notes of the late Hugh Falconer: With a*  
613 *Biographical Sketch of the Author Compiled and edited by Charles Murchison. II* (Rob.  
614 Hardwicke, 1868).
- 615 46. K. D'Aout, C. Marien, K. Leus, P. Aerts (2005) Gait patterns and hoof impact in a captive  
616 giraffid, the Okapi (*Okapia johnstoni*). in *COMPARATIVE BIOCHEMISTRY AND*  
617 *PHYSIOLOGY A-MOLECULAR & INTEGRATIVE PHYSIOLOGY* (ELSEVIER SCIENCE INC 360  
618 PARK AVE SOUTH, NEW YORK, NY 10010-1710 USA), pp S148-S148.
- 619 47. S.-i. Fujiwara, Olecranon orientation as an indicator of elbow joint angle in the stance  
620 phase, and estimation of forelimb posture in extinct quadruped animals. *Journal of*  
621 *morphology* **270**, 1107-1121 (2009).
- 622 48. G. A. Cavagna, N. C. Heglund, C. R. Taylor, Mechanical work in terrestrial locomotion:  
623 two basic mechanisms for minimizing energy expenditure. *American Journal of*  
624 *Physiology - Regulatory, Integrative and Comparative Physiology* **233**, R243-R261 (1977).
- 625 49. A. Pike, R. M. Alexander, The relationship between limb-segment proportions and joint  
626 kinematics for the hind limbs of quadrupedal mammals. *Journal of Zoology* **258**, 427-433  
627 (2002).
- 628 50. J. P. Zurano *et al.*, Cetartiodactyla: Updating a time-calibrated molecular phylogeny.  
629 *Molecular phylogenetics and evolution* **133**, 256-262 (2019).
- 630 51. L. M. Witmer, The extant phylogenetic bracket and the importance of reconstructing  
631 soft tissues in fossils. *Functional morphology in vertebrate paleontology* **1**, 19-33 (1995).

- 632 52. H. N. Bryant, A. P. Russell, The role of phylogenetic analysis in the inference of  
633 unpreserved attributes of extinct taxa. *Philosophical Transactions of the Royal Society of*  
634 *London. Series B: Biological Sciences* **337**, 405-418 (1992).
- 635 53. S. E. Warner *et al.*, Size-related changes in foot impact mechanics in hoofed mammals.  
636 *PloS one* **8**, e54784 (2013).
- 637  
638

639  
640  
641  
642  
643

## Figures and Tables

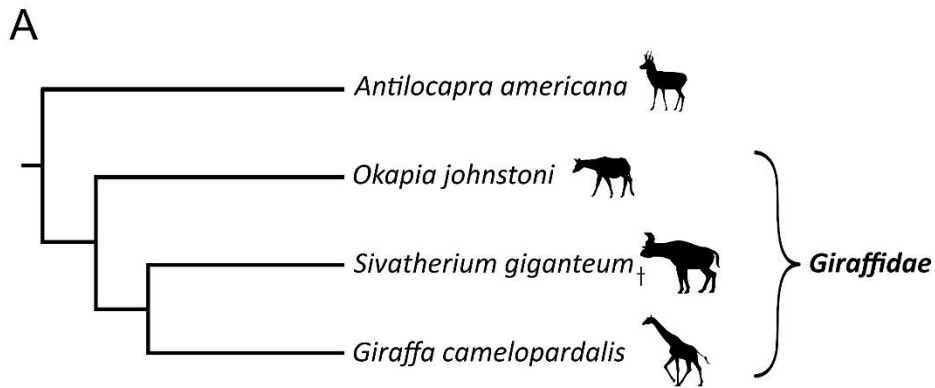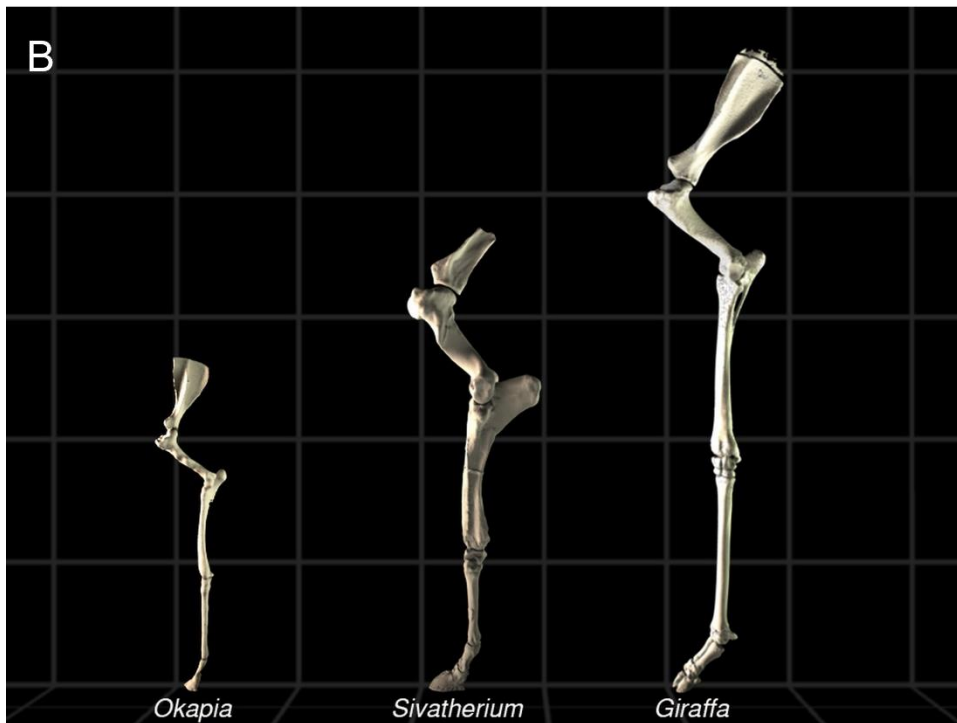

644  
645  
646  
647  
648  
649

**Figure 1 (A) Phylogeny of Giraffidae and outgroup (Ríos, Sánchez et al. 2016); † refers to an extinct taxon. Image credits: [www.phlopic.org](http://www.phlopic.org) (B) Modelled midstance postures of left forelimbs of *Okapia*, *Sivatherium* and *Giraffa*. Models are displayed to scale, with each gray box measuring 0.5 m in length.**

650

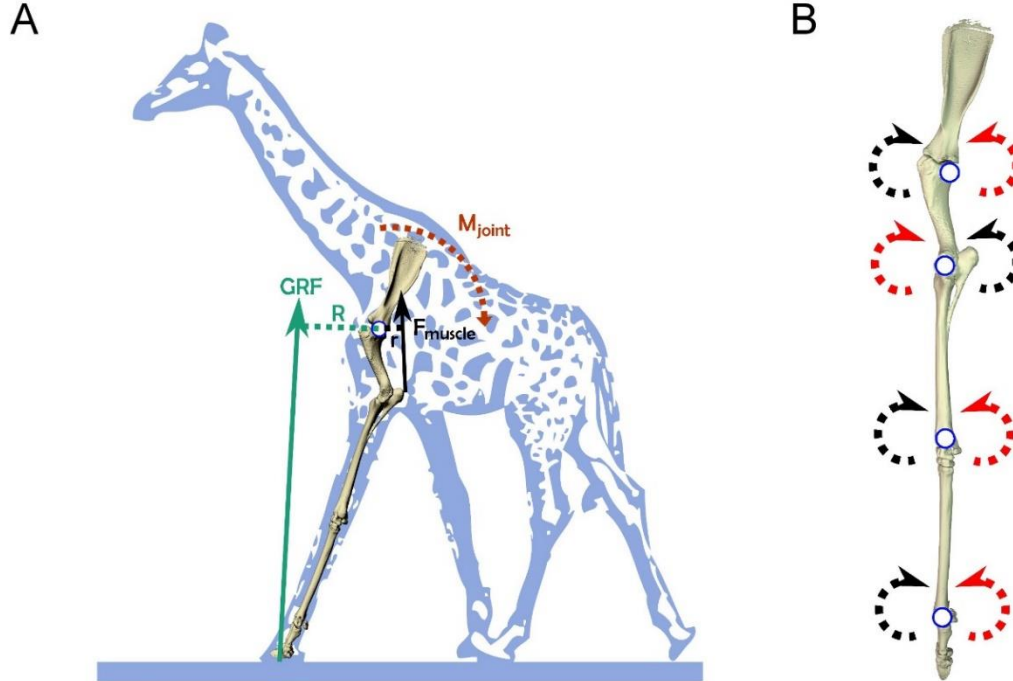

651

652

653

654

655

656

657

658

659

660

Figure 2 (A) Giraffe forelimb skeleton during the early stance phase, with associated GRF vector (green arrow), originating from a point (COP) under the foot. The GRF vector has a moment arm ( $R$ ; green dotted line) with respect to the shoulder joint, inducing a joint moment ( $M_{\text{joint}}$ ). To resist this, muscle force ( $F_{\text{muscle}}$ ) produces an opposing muscle moment, with moment arm  $r$  (short black dotted line). (B) Locations of joint centers used to set up a coordinate system for the giraffe musculoskeletal model (left forelimb in lateral view). Red arrows represent flexion; black arrows represent extension.

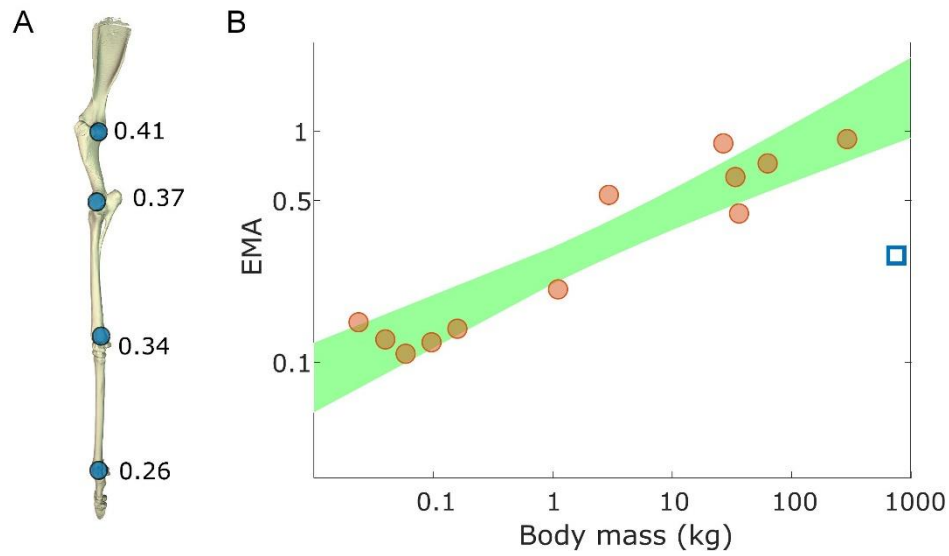

661

662 **Figure 3 (A) Mean values of EMA for each joint of the giraffe forelimb (shoulder to MCP;**  
663 **shown in vertical reference pose). (B) Giraffe forelimb EMA (blue square) fell below the**  
664 **95% prediction interval (shaded area), indicating that walking giraffes significantly deviate**  
665 **from the pattern seen in mammals of 0.03 – 297 kg at their trot-gallop transition (8).**

666



667

668

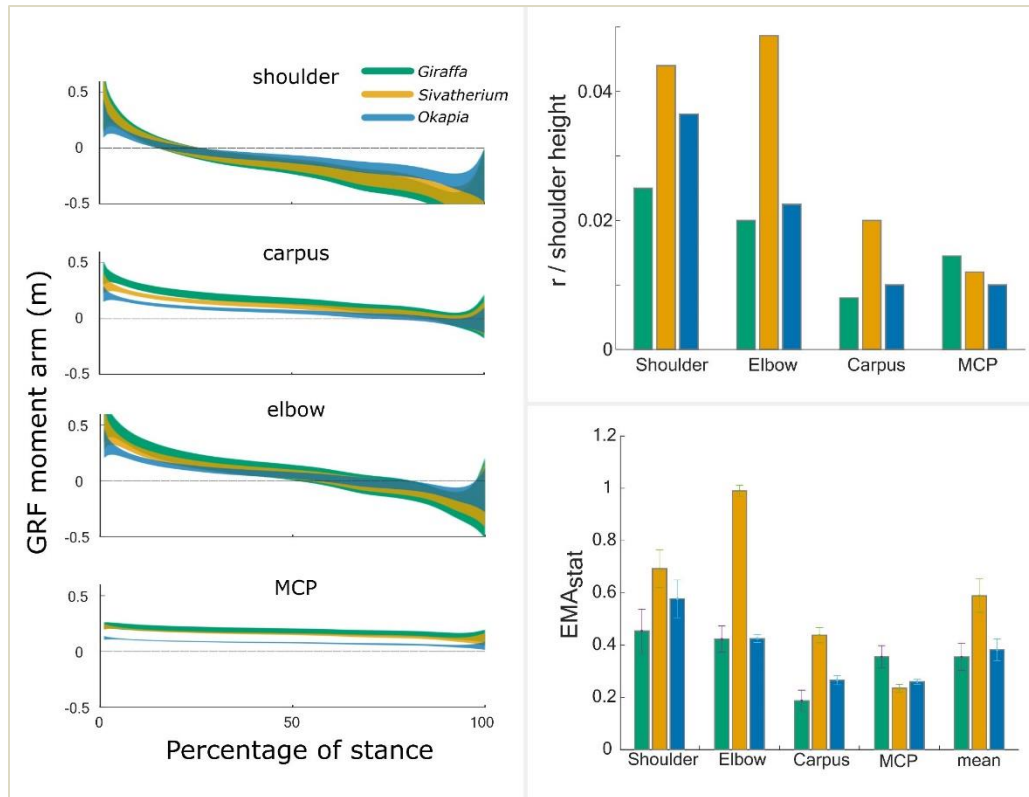

669

670 **Figure 4 (A) Modelled GRF moment arms in three giraffids, derived using data from 14**  
671 **experimental trials from *Giraffa*. Shaded regions show 95% confidence intervals for mean**  
672 **moment arm at each timepoint. *Giraffa* consistently had the greatest magnitude GRF**  
673 **moment arms. (B) Estimations of normalized muscle moment arms for the shoulder**  
674 **extensors, elbow extensors, carpal flexors and MCP flexors (i.e. antigravity muscles used**  
675 **to calculate EMA). (C) EMA<sub>stat</sub> throughout the stance phase. Due to a combination of large**  
676 **GRF moment arms and modest muscle moment arms, *Giraffa* incurred the lowest EMA of**  
677 **the giraffids studied. Error bars denote 1 standard deviation.**

678

679

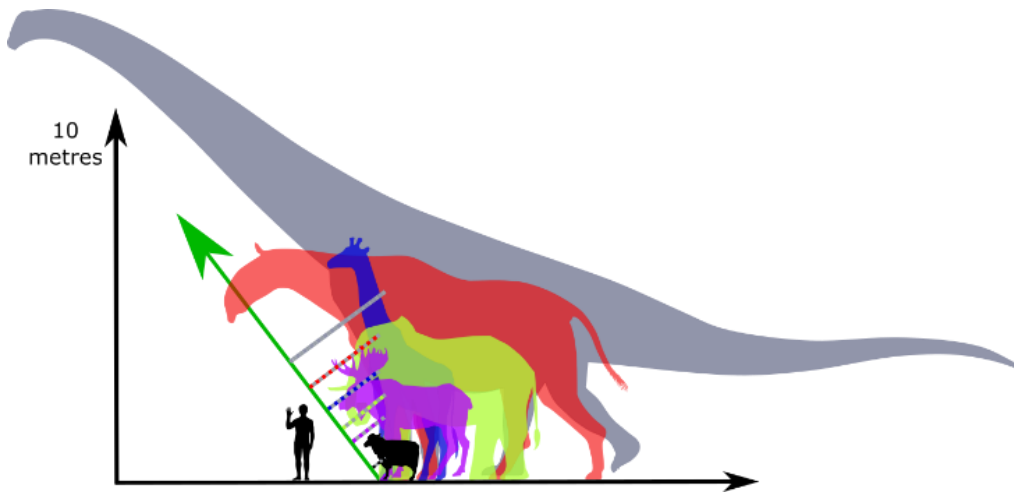

680  
681

682 **Figure 5. At increasing limb length, and given consistent GRF orientation (green arrow)**  
683 **and limb posture, GRF moment arms (dotted lines) are predicted to increase, resulting in**  
684 **progressively reduced EMA. In ascending order of size: *Ovis aries*, *Alces alces*, *Elephas***  
685 ***maximus*, *Giraffa camelopardalis*, *Paraceratherium transouralicum*, *Patagotitan mayorum*.**  
686 **Image adapted with permission from work by Wikipedia artist Steveoc 86 and**  
687 **[www.freepik.com/macrovector](http://www.freepik.com/macrovector).**

688  
689  
690  
691  
692  
693  
694  
695  
696  
697  
698  
699
